# Supplementary material
Source: ML conference proceedings conference paper supplement (https://openaccess.thecvf.com/content/ACCV2022/html/He_D3_Duplicate_Detection_ACCV_2022_paper.html)
Supplement: Supplementary file 1 [file He_D3_Duplicate_Detection_ACCV_2022_supplemental.zip]

Archive with 3 entries (3 files):
- 0035-supp.pdf
- TT.mp4
- TTD3RH_our_method.mp4
